# Supplementary material
Source: PubMed Central journal article supplement (PMC8605984)
Supplement: NIHMS1711914-supplement-2.pdf [file NIHMS1711914-supplement-2.pdf]

# Shipworm symbiosis ecology-guided discovery of an antibiotic that kills colistin-resistant *Acinetobacter*

Bailey W. Miller,<sup>1</sup> Albebson L. Lim,<sup>1</sup> Zhenjian Lin,<sup>1</sup> Jeannie Bailey,<sup>2</sup> Kari L. Aoyagi,<sup>3</sup> Mark A. Fisher,<sup>3</sup> Louis R. Barrows,<sup>4</sup> Colin Manoil,<sup>2</sup> Eric W. Schmidt,<sup>\*1,5</sup> and Margo G. Haygood<sup>\*1</sup>

<sup>1</sup>Department of Medicinal Chemistry, University of Utah, Salt Lake City, Utah, 81112, USA

<sup>2</sup>Department of Genome Sciences, University of Washington, Seattle, Washington, 98195, USA

<sup>3</sup>Department of Pathology and ARUP Laboratories, University of Utah, Salt Lake City, Utah, 84112, USA

<sup>4</sup>Department of Pharmacology and Toxicology, University of Utah, Salt Lake City, Utah, 84112, USA

<sup>5</sup>Lead Contact: Eric W. Schmidt

Correspondence: ews1@utah.edu, margo.haygood@utah.edu

## Table of Contents

### List of Figures

**Figure S1:** NMR Spectra of **1**, related to Figure 2

**Figure S2:** NMR Spectra of **2**, related to Figure 2

**Figure S3:** NMR Spectra of **3** and **4**, related to Figure 2

**Figure S4:** HRESI-MS and MSMS fragmentation of **1-4**, minor analogs, related to Figure 2

**Figure S5:** Advanced Marfey's for stereochemical analysis and ozonolysis for double bond placement of **2**, related to Figure 2

**Figure S6:** Additional antimicrobial and cytotoxicity experiments, related to Tables 1 and 2

**Figure S7:** Broth microdilution assays for MIC determination, related to Tables 1 and 2

### List of Tables

**Table S1:** <sup>1</sup>H and <sup>13</sup>C NMR assignments for **1** and **2**, related to Figure 2

**Table S2:** Retention times for hydrolysate and amino acid standards, related to Figure 2

**Table S3:** Gene annotations and nearest homologs of biosynthetic gene cluster, related to Figure 3

**Table S4:** Symbiont strain and host species used in *tur* cluster analysis, related to Figure 1

### List of Scripts

**Script 1:** *tur* gene cluster analysis script for generation of identity matrix, related to Figure 1

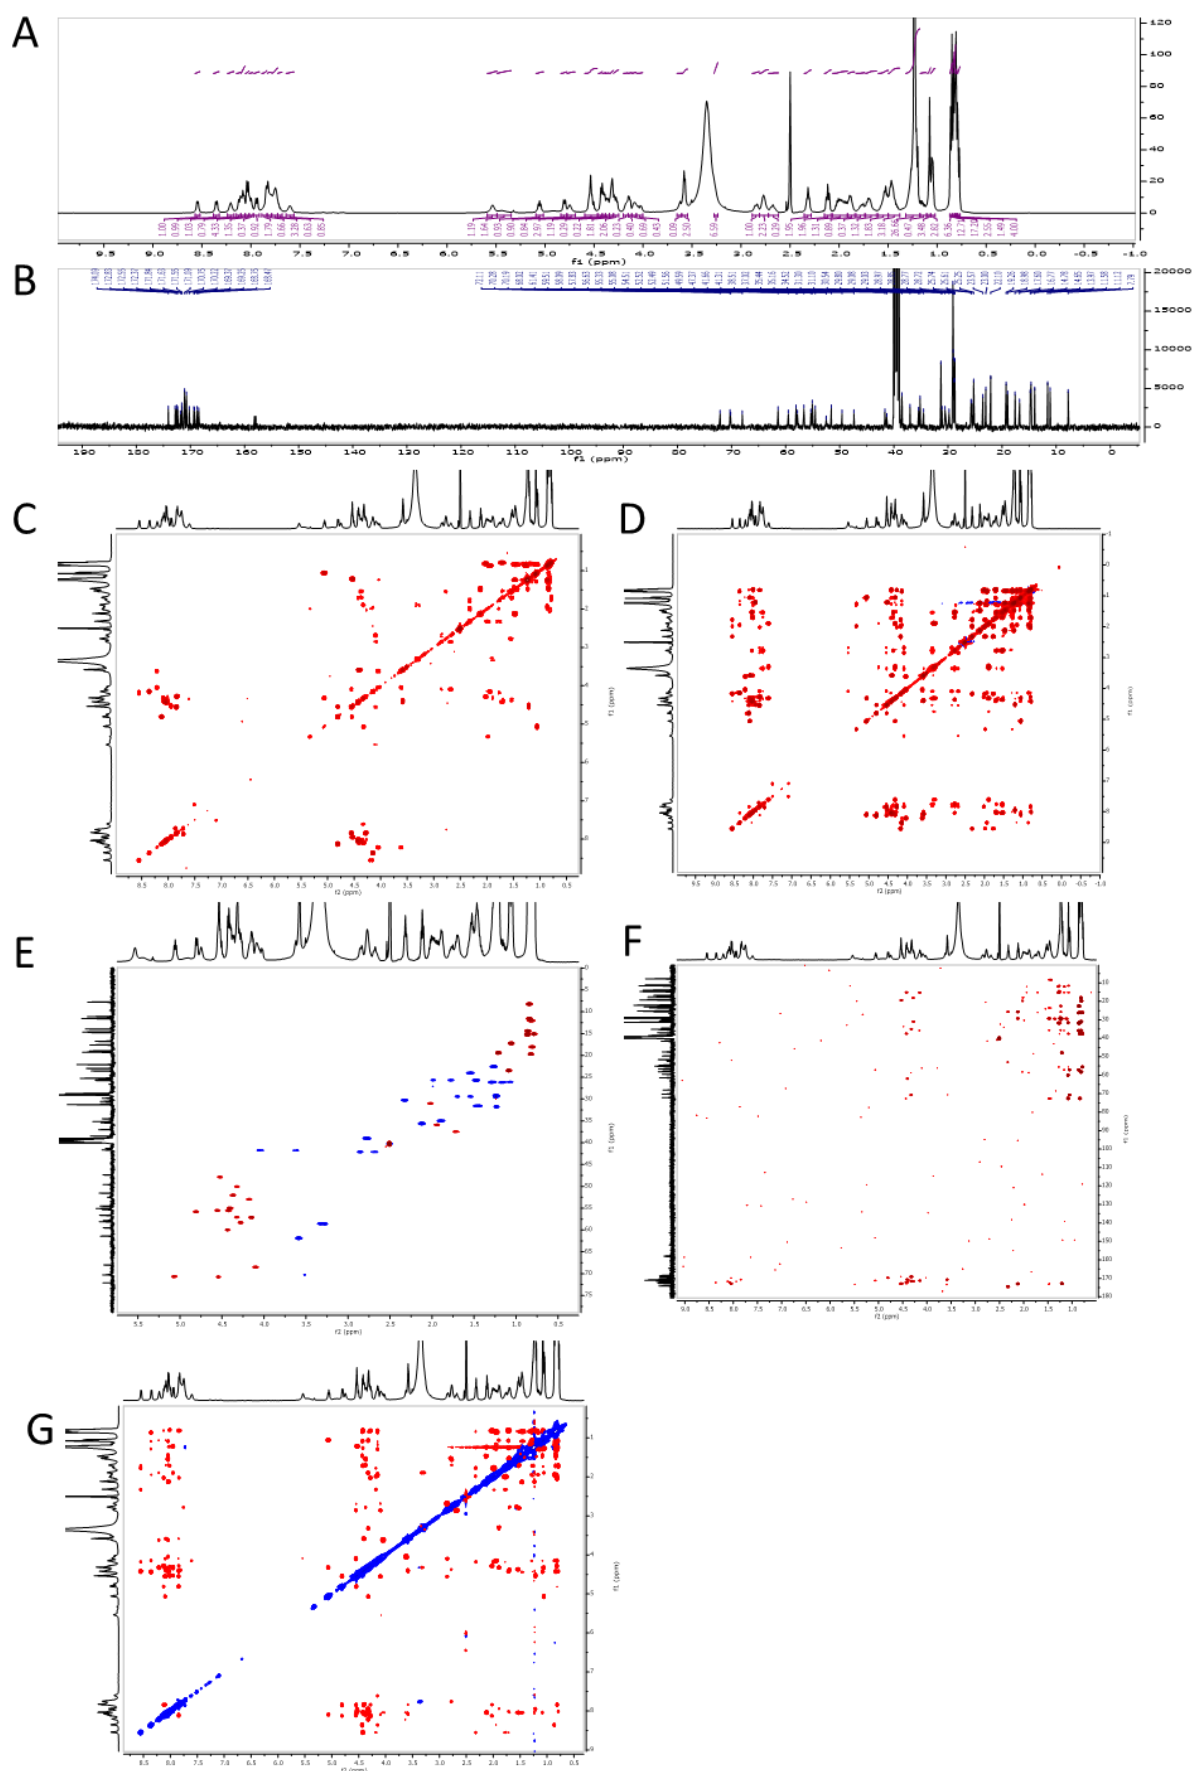

**Figure S1.** NMR Spectra of **1**, related to Figure 2. A)  $^1\text{H}$  NMR spectrum of **1** in  $\text{DMSO-}d_6$ , 500 MHz, B)  $^{13}\text{C}$  NMR Spectrum of **1**,  $\text{DMSO-}D_6$ , 125 MHz, C) gCOSY spectrum of **1**,  $\text{DMSO-}d_6$ , 500 MHz, D) zTOCSY spectrum of **1**,  $\text{DMSO-}d_6$ , 500 MHz, E) gHSQCAD spectrum of **1**,  $\text{DMSO-}d_6$ , 500 MHz, F) gHMBCAD spectrum of **1**,  $\text{DMSO-}d_6$ , 500 MHz, G) 2D ROESY spectrum of **1**,  $\text{DMSO-}d_6$ , 500 MHz

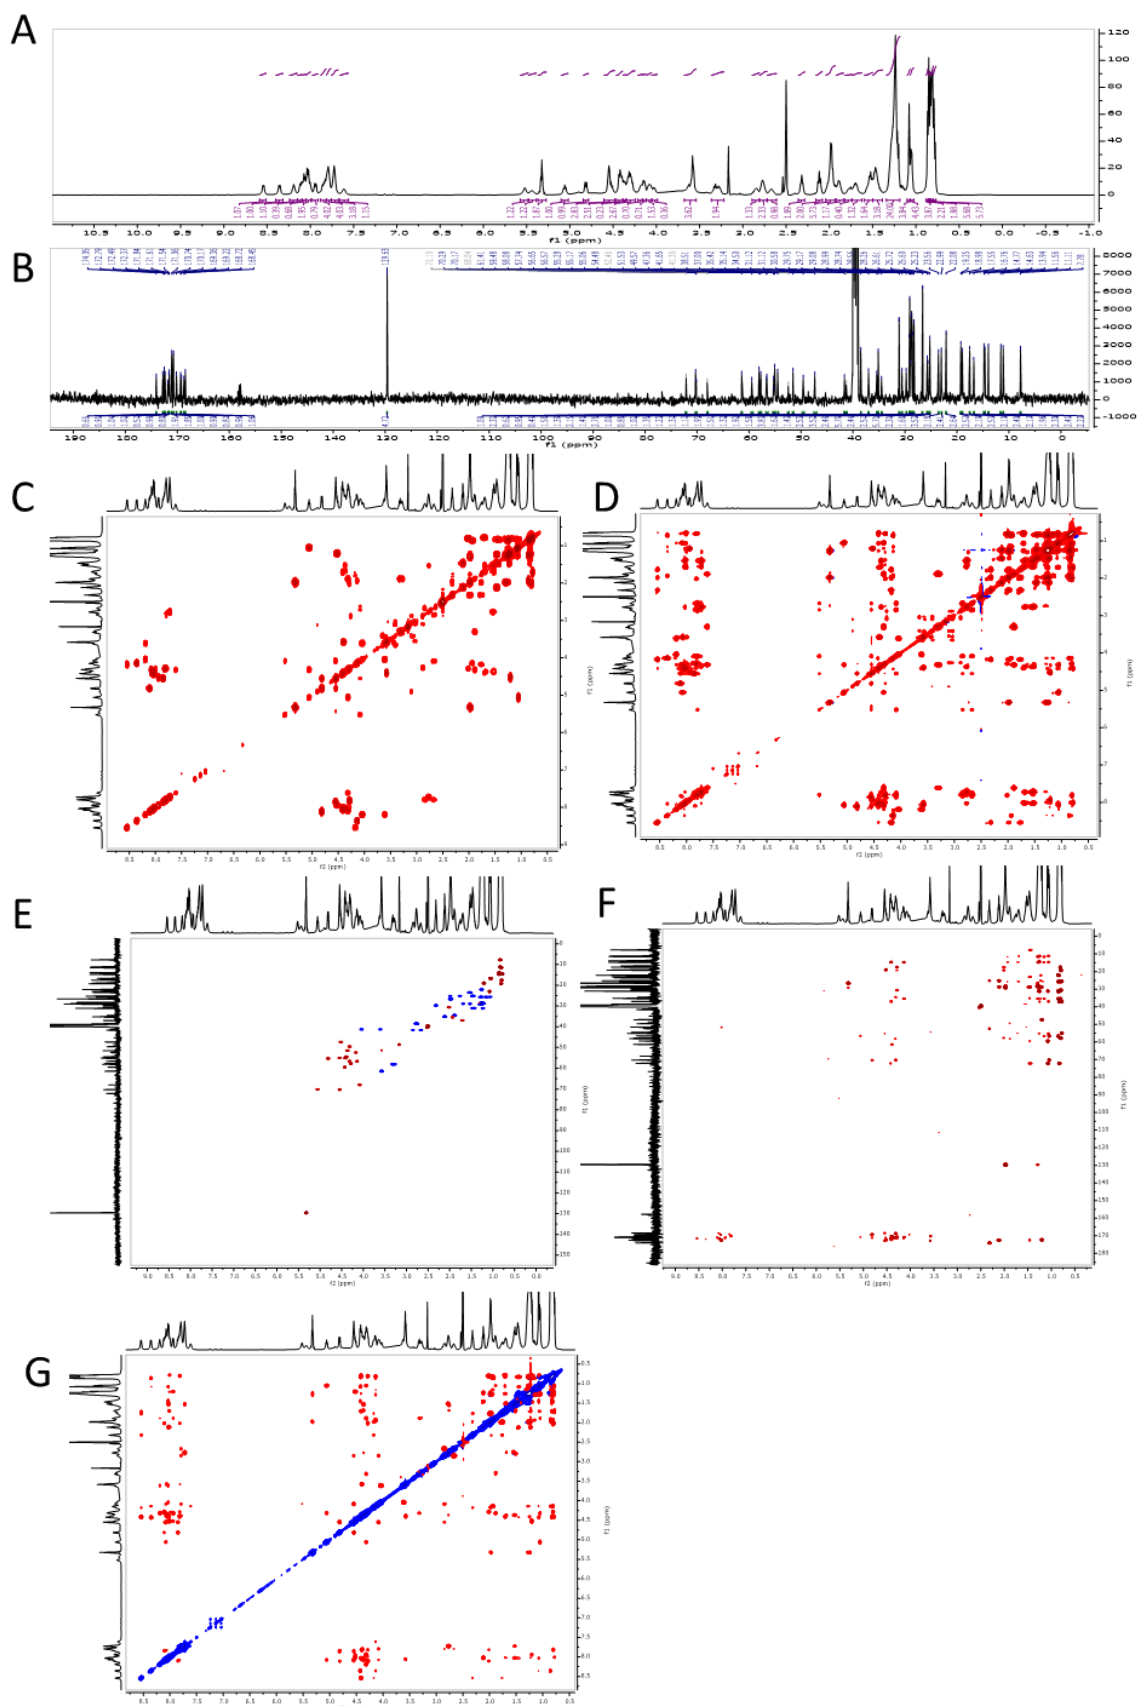

**Figure S2.** NMR Spectra of **2**, related to Figure 2. A)  $^1\text{H}$  NMR spectrum of **2** in  $\text{DMSO-}d_6$ , 500 MHz, B)  $^{13}\text{C}$  NMR Spectrum of **2**,  $\text{DMSO-}D_6$ , 125 MHz, C) gCOSY spectrum of **1**,  $\text{DMSO-}d_6$ , 500 MHz, D) zTOCSY spectrum of **2**,  $\text{DMSO-}d_6$ , 500 MHz, E) gHSQCAD spectrum of **2**,  $\text{DMSO-}d_6$ , 500 MHz, F) gHMBCAD spectrum of **2**,  $\text{DMSO-}d_6$ , 500 MHz, G) 2D ROESY spectrum of **2**,  $\text{DMSO-}d_6$ , 500 MHz

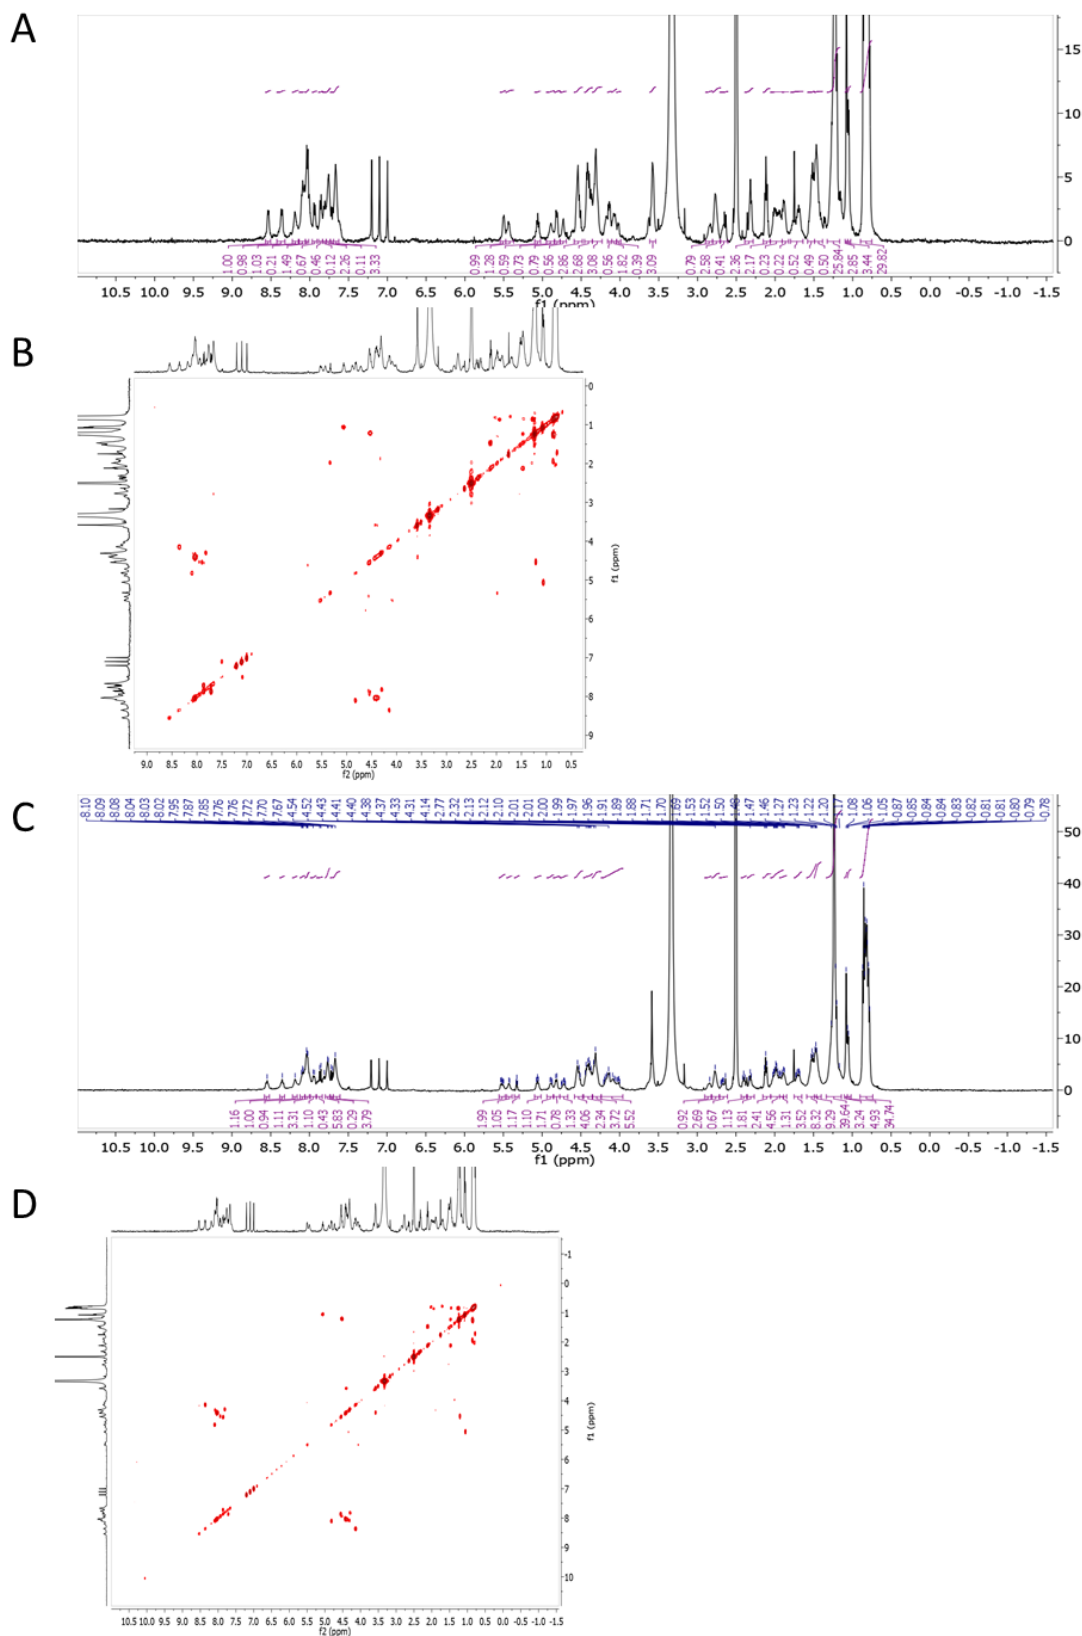

**Figure S3:** NMR Spectra of **3** and **4**, related to Figure 2. A)  $^1\text{H}$  spectrum of **3**,  $\text{DMSO-}d_6$ , 500 MHz, B) COSY spectrum of **3**,  $\text{DMSO-}d_6$ , 500 MHz, C)  $^1\text{H}$  NMR spectrum of **4**,  $\text{DMSO-}d_6$ , 500 MHz, D) COSY spectrum of **4**,  $\text{DMSO-}d_6$ , 500 MHz

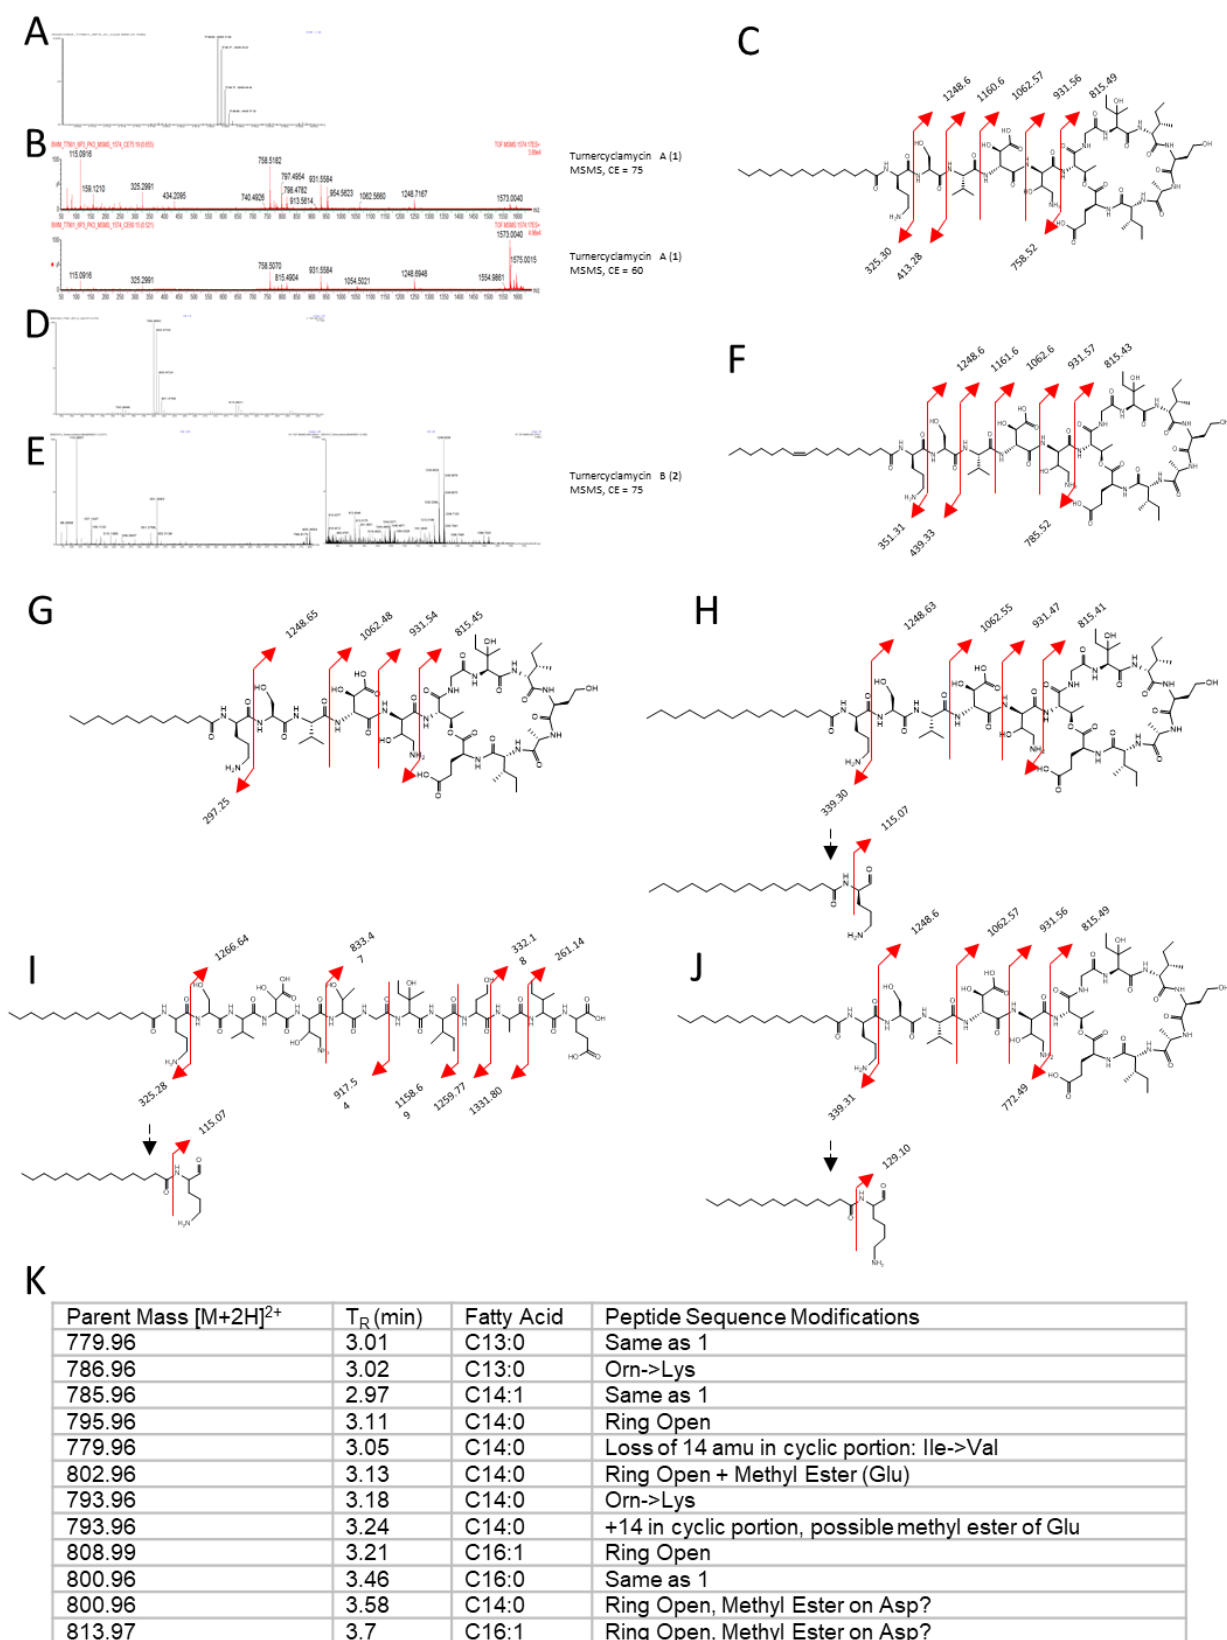

**Figure S4: Figure S4:** HRESI-MS and MSMS fragmentation of **1-4**, minor analogs, related to Figure 2. A) MSMS fragmentation of **3**, B) MSMS fragmentation of **4**, C) Characteristic ions from a ring open analog. While the cyclic portion does not fragment well in the intact molecule, the linearized peptide shows fragments from within the tail. All fragments that include that region also include the mass of an additional H<sub>2</sub>O. D) Characteristic fragment ions arising from the Orn->Lys analogs. The FA and the adjacent residue can be distinguished by the subsequent fragmentation to  $m/z = 115.07$  (Orn) or  $129.10$  (Lys). A full table of minor analogs can be found in Table S2.

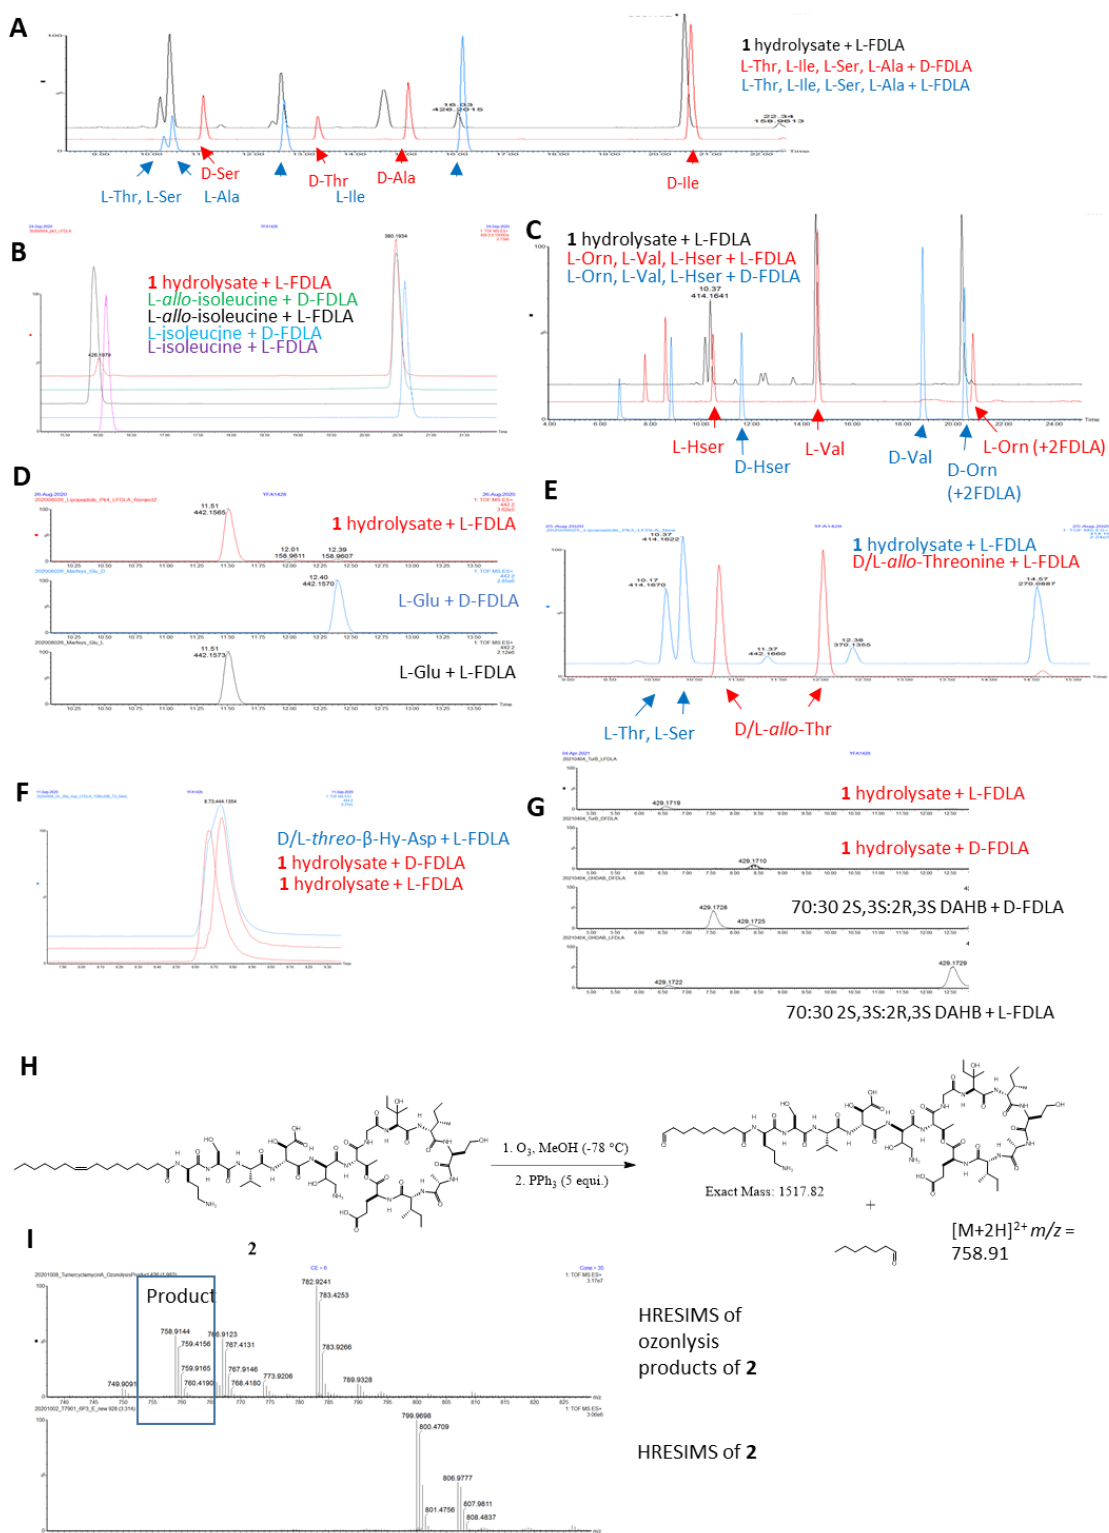

**Figure S5:** Advanced Marfey's for stereochemical analysis and ozonolysis for double bond placement of **2**, related to Figure 2. Panels A-E compare the L-FDLA derivitized hydrolysate of **1** to the L- or D-FDLA derivitized standards for A) L-Thr, L-Ile, L-Ser, L-Ala; B) L-*allo*-Ile and L-Ile; C) L-Orn, L-Val, L-homoSer; D) L-Glu; E) D/L-*allo*-Thr. Panel F shows EIC of L-FDLA derivitized D/L-*threo*-β-Hy-ASP compared to the L- and D-FDLA derivitized hydrolysate of **1**. Panel G shows EIC of L-FDLA or D-FDLA derivitized reaction mixtures from the synthesis of DAHB compared to EICs of the L-FDLA or D-FDLA derivitized hydrolysate of **1**. Panel H is a reaction scheme for ozonolysis and reductive workup of **2**. I) HRESIMS of ozonolysis products. Only one product matched a mass that could be explained by a terminal aldehyde in the fatty acid chain. This mass matched a 9-formyl-nonoic acid containing peptide. The other masses observed match the aldehyde product with additional oxidations.

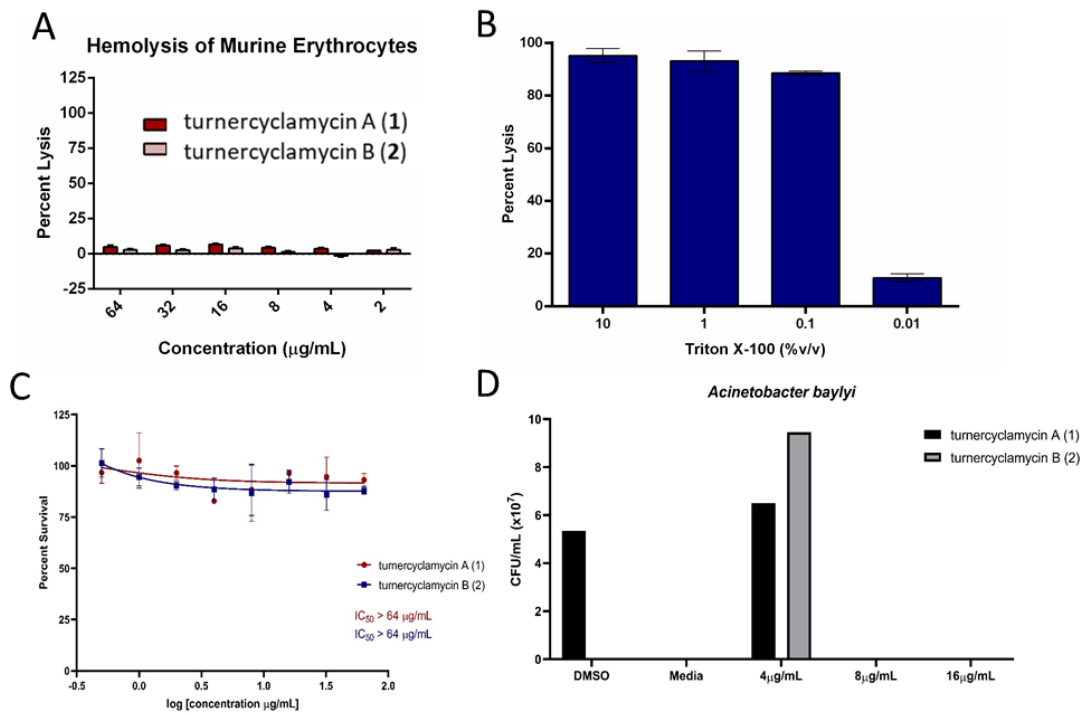

**Figure S6:** Additional antimicrobial and cytotoxicity experiments, related to Tables 1 and 2. A) **1** and **2** were both inactive in a cell lysis assay with murine erythrocytes, while B) Triton-X-100, the positive control, acted as expected. C) **1** and **2** were non-toxic to mammalian HEK-293 (ATCC<sup>®</sup> CRL-1573<sup>™</sup>) cells up to 64  $\mu\text{g/mL}$ . D) In order to distinguish between bactericidal vs. bacteriostatic activity, *A. baylyi* was incubated in the presence of **1** (dark) and **2** (light) at 4, 8, and 16  $\mu\text{g/mL}$  for 18 hours, then cultures were streaked on fresh agar plates to assess cell viability. At the MIC, no colonies formed on the plates, indicating bactericidal, rather than bacteriostatic activity



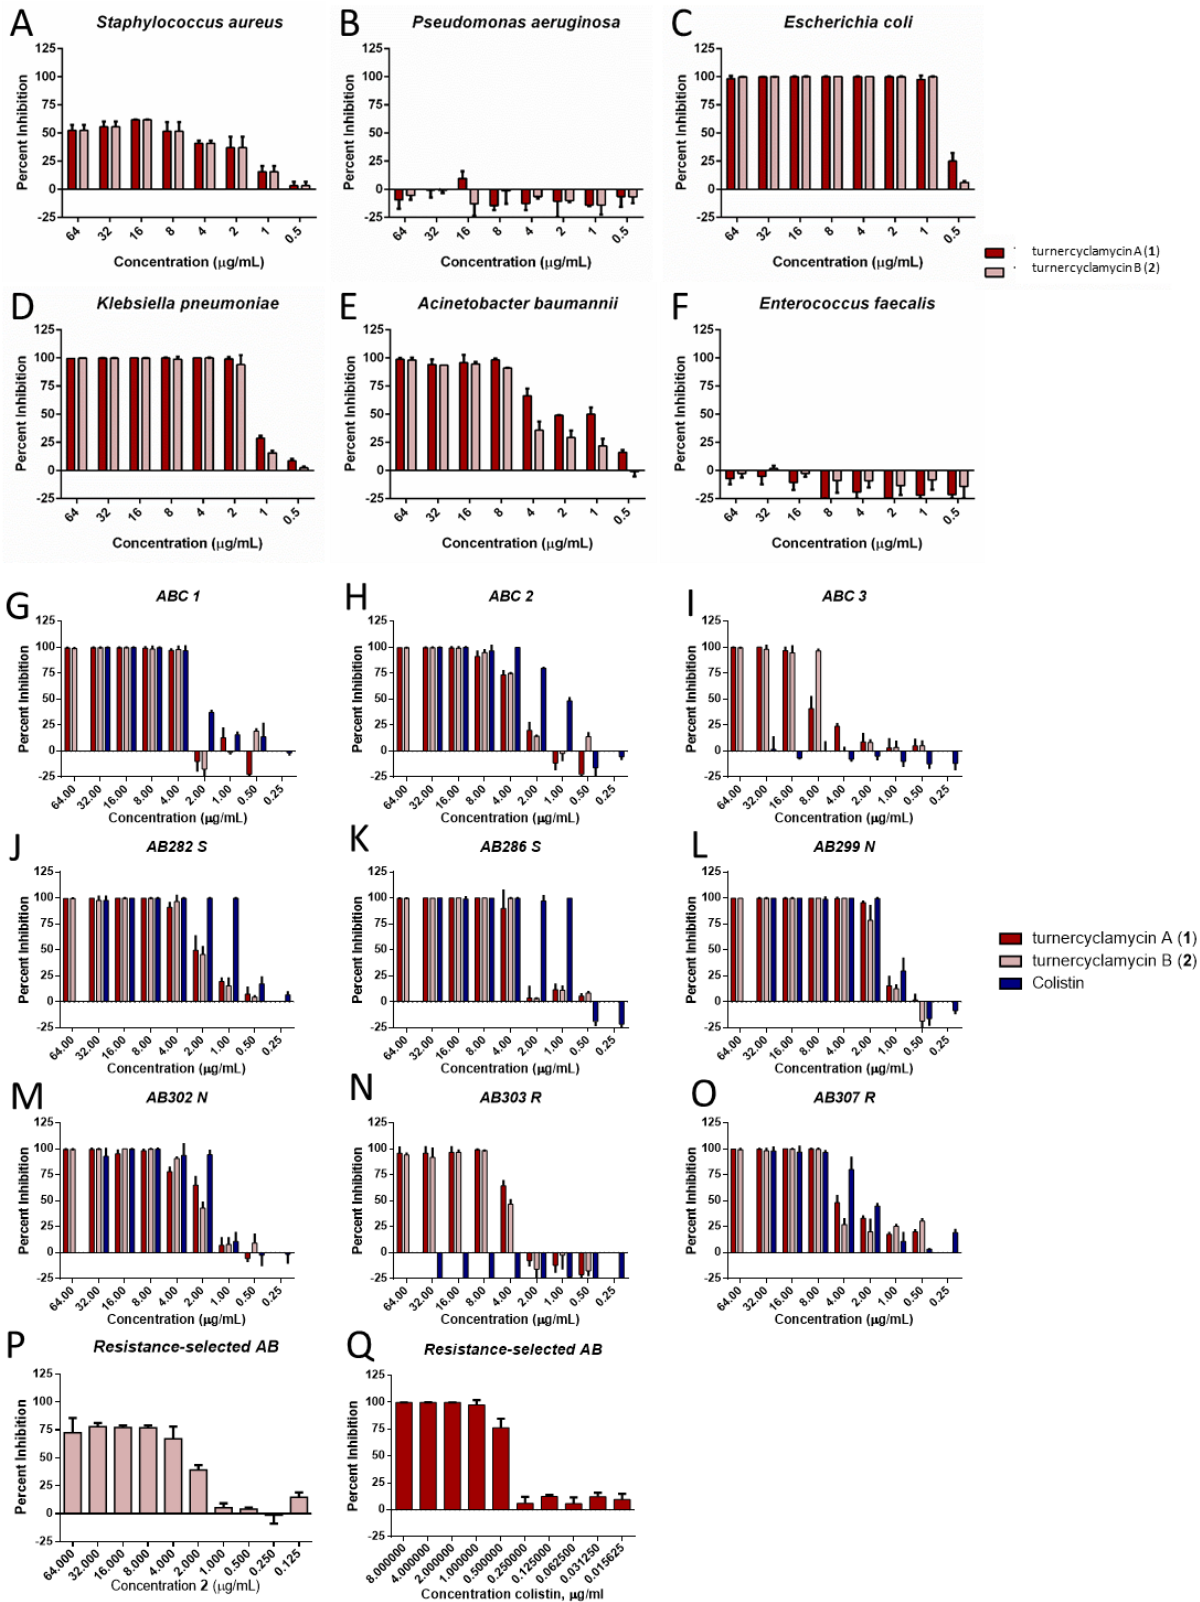

**Figure S7:** Broth microdilution assays for MIC determination, related to Tables 1 and 2. A-F) Antimicrobial microdilution assays for determination of minimum inhibitory concentrations of **1** (dark red), **2** (light red), and colistin (blue) against a panel of *Acinetobacter* strains. G-O) *Acinetobacter* complex (ABC) 1, 2, and 3 were obtained from ARUP laboratories. The additional six strains are all obtained from the CDC and have varying levels of resistance to the last line antibiotic colistin. Strains with the designation S are susceptible (colistin MIC = 1 µg/mL), N are normal (MIC = 2 µg/mL), and R are resistant strains (MIC > 8 µg/mL). Each strain was incubated in the presence of compound for 18-20 hours and viability was measured using MTT.



**Table S1.** <sup>1</sup>H and <sup>13</sup>C NMR assignments for **1** and **2**, related to Figure 2

| Residue                           | Position                  | <b>1</b>   |                            | <b>2</b>   |                          |
|-----------------------------------|---------------------------|------------|----------------------------|------------|--------------------------|
|                                   |                           | $\delta_C$ | $\delta_H$ (J in Hz)       | $\delta_C$ | $\delta_H$ (J in Hz)     |
| Ornithine                         | NH                        |            | 8.03 <sup>a</sup>          |            | 8.03 <sup>a</sup>        |
|                                   | C=O                       | 171.6      |                            | 171.6      |                          |
|                                   | $\alpha$ -C               | 51.6       | 4.37 m                     | 51.5       | 4.37 m                   |
|                                   | $\beta$ -C                | 29.0       | 1.53 m, 1.69 m             | 29.0       | 1.53 m, 1.69 m           |
|                                   | $\gamma$ -C               | 23.6       | 1.53 <sup>a</sup>          | 23.6       | 1.53 <sup>a</sup>        |
|                                   | $\delta$ -C               | 38.5       | 2.77 br                    | 38.5       | 2.77 br                  |
|                                   | NH <sub>3</sub>           |            | 7.72                       |            | 7.72                     |
| Serine                            | NH                        |            | 8.06 <sup>a</sup>          |            | 8.06 <sup>a</sup>        |
|                                   | C=O                       | 170.2      |                            | 170.2      |                          |
|                                   | $\alpha$ -C               | 54.5       | 4.39 <sup>a</sup>          | 54.5       | 4.39 <sup>a</sup>        |
|                                   | $\beta$ -C                | 61.4       | 3.58 d (5.8)               | 61.4       | 3.59 d (5.8)             |
|                                   | $\beta$ -OH               |            | N/A                        |            | N/A                      |
| Valine                            | NH                        |            | 7.82 <sup>a</sup>          |            | 7.82 <sup>a</sup>        |
|                                   | C=O                       | 171.1      |                            | 171.1      |                          |
|                                   | $\alpha$ -C               | 57.7       | 4.28                       | 57.7       | 4.28                     |
|                                   | $\beta$ -C                | 30.5       | 2.02 m                     | 30.6       | 2.02 m                   |
|                                   | $\gamma_1$ -C             | 17.6       | 0.80 <sup>a</sup>          | 17.6       | 0.80 <sup>a</sup>        |
|                                   | $\gamma_2$ -C             | 19.3       | 0.82 <sup>a</sup>          | 19.3       | 0.82 <sup>a</sup>        |
| $\beta$ -OH-Aspartic acid         | NH                        |            | 8.12 d (9.4)               |            | 8.13 d (9.0)             |
|                                   | C=O                       | 169.2      |                            | 169.2      |                          |
|                                   | $\alpha$ -C               | 55.3       | 4.80 dd (8.9, 2.6)         | 55.3       | 4.82 dd (8.8, 2.6)       |
|                                   | $\beta$ -C                | 70.3       | 4.55 <sup>a</sup>          | 70.3       | 4.55 <sup>a</sup>        |
|                                   | $\beta$ -OH               |            | N/A                        |            | N/A                      |
|                                   | $\gamma$ -C = O           | 168.5      |                            | 168.5      |                          |
| 2,4-Diamino-3-hydroxybutyric acid | NH                        |            | 7.84 <sup>a</sup>          |            | 7.85 <sup>a</sup>        |
|                                   | C=O                       | 172.8      |                            | 172.8      |                          |
|                                   | $\alpha$ -C               | 55.1       | 4.55 <sup>a</sup>          | 55.1       | 4.55 <sup>a</sup>        |
|                                   | $\beta$ -C                | 68.0       | 4.09 m                     | 68.0       | 4.08 m                   |
|                                   | $\beta$ -OH               |            | 5.54 br                    |            | 5.52 br                  |
|                                   | $\gamma$ -C               | 41.7       | 2.68, 2.85 m               | 41.7       | 2.67, 2.86 m             |
|                                   | $\gamma$ -NH <sub>3</sub> |            | 7.79 t (br)                |            | 7.79 t (br)              |
| Threonine                         | NH                        |            | 8.07 <sup>a</sup>          |            | 8.07 <sup>a</sup>        |
|                                   | C=O                       | 168.7      |                            | 168.7      |                          |
|                                   | $\alpha$ -C               | 56.6       | 4.32 m                     | 56.6       | 4.32 m                   |
|                                   | $\beta$ -C                | 70.2       | 5.05 p (6.7)               | 70.2       | 5.06 p (6.7)             |
|                                   | $\gamma$ -C               | 16.8       | 1.05 d (6.5)               | 16.8       | 1.05 d (6.5)             |
| Glycine                           | NH                        |            | 8.21 t (6.0)               |            | 8.19 t (6.1)             |
|                                   | C=O                       | 169.4      |                            | 169.4      |                          |
|                                   | $\alpha$ -C               | 41.3       | 3.6 m, 4.05 dd (16.2, 5.3) | 41.3       | 3.6 m, 4.04 dd (16, 5.4) |
| 3-OH-isoleucine                   | NH                        |            | 8.03 <sup>a</sup>          |            | 8.03 <sup>a</sup>        |
|                                   | C=O                       | 171.8      |                            | 171.8      |                          |
|                                   | $\alpha$ -C               | 59.5       | 4.42 d (7.0)               | 59.5       | 4.42 d (7.3)             |
|                                   | $\beta$ -C                | 72.1       |                            | 72.1       |                          |
|                                   | $\gamma_1$ -C             | 23.0       | 1.08 s                     | 23.0       | 1.08 s                   |
|                                   | $\gamma_2$ -C             | 31.1       | 1.45 m                     | 31.1       | 1.45 m                   |
|                                   | $\delta$ -C               | 7.8        | 0.83 <sup>a</sup>          | 7.8        | 0.83 <sup>a</sup>        |
| Isoleucine (1)                    | NH                        |            | 8.35 d (7.7)               |            | 8.36 d (7.8)             |
|                                   | C=O                       | 170.7      |                            | 170.7      |                          |
|                                   | $\alpha$ -C               | 56.7       | 4.14 dd (7.6, 4.5)         | 56.7       | 4.14 dd (7.6, 4.6)       |
|                                   | $\beta$ -C                | 35.4       | 1.93 m                     | 35.4       | 1.93 m                   |
|                                   | $\gamma_1$ -C             | 14.8       | 0.86 d (6.8)               | 14.8       | 0.87 d (6.8)             |

|                |                 |               |                                       |               |                                       |
|----------------|-----------------|---------------|---------------------------------------|---------------|---------------------------------------|
|                | $\gamma_2$ -C   | 25.7          | 1.16 m, 1.29 m                        | 25.7          | 1.16 m, 1.29 m                        |
|                | $\delta$ -C     | 11.6          | 0.81 <sup>a</sup>                     | 11.6          | 0.81 <sup>a</sup>                     |
| Homoserine     | NH              |               | 7.60 d (br)                           |               | 7.61 d (br)                           |
|                | C=O             | 171.1         |                                       | 171.1         |                                       |
|                | $\alpha$ -C     | 49.6          | 4.32 <sup>a</sup>                     | 49.6          | 4.32 <sup>a</sup>                     |
|                | $\beta$ -C      | 34.5          | 1.89 m                                | 34.5          | 1.89 m                                |
|                | $\gamma$ -C     | 58.1          | 3.31 m                                | 58.1          | 3.31 m                                |
|                | $\gamma$ -OH    |               |                                       |               |                                       |
| Alanine        | NH              |               | 7.94 d (8.6)                          |               | 7.94 d (8.6)                          |
|                | C=O             | 172.4         |                                       | 172.4         |                                       |
|                | $\alpha$ -C     | 47.4          | 4.52 m                                | 47.4          | 4.52 m                                |
|                | $\beta$ -C      | 19.0          | 1.20 d (7.1)                          | 19.0          | 1.2 d (7.1)                           |
| Isoleucine (2) | NH              |               | 8.01 d (8.8)                          |               | 8.01 <sup>a</sup>                     |
|                | C=O             | 171.5         |                                       | 171.5         |                                       |
|                | $\alpha$ -C     | 55.0          | 4.41 <sup>a</sup>                     | 55.0          | 4.41 <sup>a</sup>                     |
|                | $\beta$ -C      | 37.0          | 1.71 m                                | 37.0          | 1.71 m                                |
|                | $\gamma_1$ -C   | 25.6          | 1.06 <sup>a</sup> , 1.25 <sup>a</sup> | 25.6          | 1.06 <sup>a</sup> , 1.25 <sup>a</sup> |
|                | $\gamma_2$ -C   | 14.7          | 0.78 d (7.0)                          | 14.6          | 0.78 d (7.8)                          |
|                | $\delta$ -C     | 11.1          | 0.83 <sup>a</sup>                     | 11.1          | 0.83 <sup>a</sup>                     |
| Glutamic acid  | NH              |               | 8.54 d (6.7)                          |               | 8.54 d (6.7)                          |
|                | C=O             | 170.7         |                                       | 170.7         |                                       |
|                | $\alpha$ -C     | 52.5          | 4.18 m                                | 52.5          | 4.17 m                                |
|                | $\beta$ -C      | 25.1          | 1.77 m, 1.99 m                        | 25.1          | 1.76 m, 1.99 m                        |
|                | $\gamma$ -C     | 29.8          | 2.32 t (7.4)                          | 29.8          | 2.32 t (7.4)                          |
|                | $\delta$ -C = O | 174.1         |                                       | 174.1         |                                       |
| Fatty Acid     | 1               | 172.6         |                                       | 172.4         |                                       |
|                | 2               | 35.1          | 2.12 t (7.1)                          | 35.1          | 2.12 t (7.1)                          |
|                | 3               | 25.3          | 1.48 m                                | 25.3          | 1.47 m                                |
|                | 4               | 28.7-<br>29.1 | 1.21-1.30                             | 28.7-<br>29.1 | 1.21-1.30                             |
|                | 5               | 28.7-<br>29.1 | 1.21-1.30                             | 28.7-<br>29.1 | 1.21-1.30                             |
|                | 6               | 28.7-<br>29.1 | 1.21-1.30                             | 28.7-<br>29.1 | 1.21-1.30                             |
|                | 7               | 28.7-<br>29.1 | 1.21-1.30                             | 29.2          | 1.29                                  |
|                | 8               | 28.7-<br>29.1 | 1.21-1.30                             | 26.7          | 1.98                                  |
|                | 9               | 28.7-<br>29.1 | 1.21-1.30                             | 129.6         | 5.32                                  |
|                | 10              | 28.7-<br>29.1 | 1.21-1.30                             | 129.6         | 5.32                                  |
|                | 11              | 28.7-<br>29.1 | 1.21-1.30                             | 26.7          | 1.98                                  |
|                | 12              | 28.7-<br>29.1 | 1.21-1.30                             | 29.2          | 1.29                                  |
|                | 13              | 28.7-<br>29.1 | 1.21-1.30                             | 28.7-<br>29.1 | 1.21-1.30                             |
|                | 14              | 13.9          | 0.86                                  | 31.1          | 1.24                                  |
|                | 15              |               |                                       | 22.1          | 1.26                                  |
|                | 16              |               |                                       | 13.9          | 0.85                                  |

<sup>a</sup>multiplicity and coupling undetermined due to signal overlap

**Table S2:** Retention times for hydrolysate and amino acid standards, related to Figure 2

| Amino Acid                              | $t_{R-FDLA}$ (min) Analyte | $t_{R}$ (min) Standard | $t_{RD}$ (min) Standard |
|-----------------------------------------|----------------------------|------------------------|-------------------------|
| Valine                                  | 14.58                      | 14.63                  | 18.7                    |
| Alanine                                 | 12.54                      | 12.61                  | 15.15                   |
| Serine                                  | 10.36                      | 10.41                  | 11.01                   |
| Threonine                               | 10.17                      | 10.25                  | 13.27                   |
| allo-Threonine                          | N/A                        | 10.8/12.05             | 10.8/12.05              |
| Isoleucine                              | N/A                        | 16.11                  | 20.6                    |
| allo-Isoleucine                         | 20.49                      | 15.95                  | 20.49                   |
| Glutamic acid                           | 11.51                      | 11.51                  | 12.4                    |
| Homoserine                              | 10.36                      | 10.47                  | 11.44                   |
| $\beta$ -OH-Aspartic Acid               | 8.66                       | 8.73                   | 8.66                    |
| $\alpha$ N, $\delta$ N-diFDLA Ornithine | 20.4                       | 20.82                  | 20.45                   |
| 2S,3S- $\beta$ -OH-DAB                  | N/A                        | 7.55                   | 12.6                    |
| 2R,3S- $\beta$ -OH-DAB                  | 8.3                        | 8.31                   | 6.59                    |

**Table S3:** Gene annotations and nearest homologs of biosynthetic gene cluster, related to Figure 3

| Gene          | Gene name   | Protein Size (AAs) | Annotation or Proposed Function           | Homolog (Accession, organism)                            | Identity (%) |
|---------------|-------------|--------------------|-------------------------------------------|----------------------------------------------------------|--------------|
| TERTU_RS10355 | <i>turF</i> | 332                | Fe/ $\alpha$ Kg dependent dioxygenase     | WP_144695392.1, Alteromonadaceae bacterium 2753L.S.0a.02 | 71.9         |
| TERTU_RS10350 | <i>turG</i> | 290                | jmjC-like cupin domain containing protein | WP_044617703.1, Gynuella sunshinyii                      | 47.45        |
| TERTU_RS10345 | <i>turH</i> | 322                | Fe/ $\alpha$ Kg dependent dioxygenase     | WP_044619903.1, Gynuella sunshinyii                      | 61.49        |
| TERTU_RS10340 | <i>turI</i> | 561                | Cyclic peptide export ABC transporter     | WP_044616742.1, Gynuella sunshinyii                      | 68.86        |
| TERTU_RS10335 | <i>turA</i> | 3718               | NRPS                                      | WP_044616743.1, Gynuella sunshinyii                      | 48.39        |
| TERTU_RS10330 | <i>turB</i> | 4249               | NRPS                                      | WP_044616744.1, Gynuella sunshinyii                      | 54.07        |
| TERTU_RS10325 | <i>turC</i> | 2214               | NRPS                                      | WP_044616745.1, Gynuella sunshinyii                      | 56.71        |
| TERTU_RS10320 | <i>turD</i> | 2685               | NRPS                                      | WP_052830181.1, Gynuella sunshinyii                      | 62.56        |
| TERTU_RS21365 | <i>turE</i> | 4025               | NRPS                                      | WP_052830181.1, Gynuella sunshinyii                      | 60.44        |
| TERTU_RS10310 | <i>turJ</i> | 531                | MBL fold metallo-hydrolase                | WP_044616748.1, Gynuella sunshinyii                      | 72.69        |
| TERTU_RS10305 | <i>turK</i> | 542                | Family 43 glycosylhydrolase               | WP_012488586.1, Cellvibrio japonicus                     | 67.34        |
| TERTU_RS10300 | <i>turL</i> | 417                | Lipolytic enzyme                          | NVK57725.1, Alteromonadaceae bacterium                   | 68.01        |

**Table S4:** Symbiont strain and host species used in *tur* cluster analysis, related to Figure 1

| Symbiont          | Host               |                     |                                         |
|-------------------|--------------------|---------------------|-----------------------------------------|
|                   | Genus              | Species             | Location                                |
| T7901             | <i>Bankia</i>      | <i>gouldi</i>       | Beaufort, NC, USA                       |
| T8602             | <i>Dicyathifer</i> | <i>manni</i>        | Townsville, QLD, Aus.                   |
| T7902             | <i>Lyrodus</i>     | <i>pedicellatus</i> | Long Beach, CA, USA                     |
| T8513             | <i>Teredo</i>      | <i>navalis</i>      | Sao Paulo, Brazil                       |
| T8412             | <i>Lyrodus</i>     | <i>bipartitus</i>   | Jim Isl., Fort Pierce, FL               |
| T8402             | <i>Teredora</i>    | <i>malleolus</i>    | Floating wood                           |
| PMS-1133Y.S.0a.04 | N/A                | N/A                 | Bil-isan, Panglao, Bohol, Philippines   |
| PMS-991H.S.0a.06  | <i>Lyrodus</i>     | <i>pedicellatus</i> | Danao, Iloilo City, Iloilo, Philippines |

**Script 1:** *tur* gene cluster analysis script for generation of identity matrix, related to Figure 1

```
#!/bin/bash
rm temp3
rm $2
n1=$(grep -n "FEATURES" $1 | awk -F : '{print $1}')
n2=$(grep -n "ORIGIN" $1 | awk -F : '{print $1}')
sed -n "$n1, $n2 p" $1 > temp1
cut -b 1-20 temp1 | nl -b a > temp2
while read s1 s2; do
    if [ "$s2" != "" ]; then
        echo $s1 $s2 >> temp3
    fi
done < temp2
nl -b a temp3 > temp3_1
while read line1 line2 line3; do
    if [ "$line3" = "unsure" ]; then # replace "unsure" with "CDS" if extract NRPS genes
        line_start=$line2
        line_next=$((line1+1))
        line_end=$((sed -n "$line_next p" temp3_1 | awk '{print $2}')->1)
        sed -n "$line_start, $line_end p" temp1 | sed 's/^\{21\}/' > temp4
        grep -n "\V" temp4 | awk -F : '{print $1,$2}' | nl -b a > temp5
        temp4_line=$(grep \^ temp4 | wc -l)
        temp5_line=$(grep \^ temp5 | wc -l)
        seq_head1=$(echo $1 | awk -F / '{print $NF}' | awk -F . '{print $1}')
        seq_head2=$(grep "/domain_id=" temp4 | awk -F "\ " '{print $2}' | sed 's/_/_/g')
        # seq_head2=$(grep "/locus_tag=" temp4 | sed 's/_locus_tag=/' | sed 's/_/_/g' | awk
-F _ '{print $(NF-1)}' "$NF}') # enable this line if extract NRPS genes
        seq_head3=$(grep "/specificity=" temp4 | awk -F "\ " '{print $2}' | sed 's/_/_/g')
        aSDomain=$(grep "/aSDomain=" temp4 | awk -F "\ " '{print $2}' | sed 's/_/_/g')
        if [ "$aSDomain" = "AMP-binding" ]; then # remove this if loop if extract A-domain only
            echo \>$seq_head1_"$seq_head2_"$seq_head3 >> $2
            read position seq_start <<< $(grep "translation=" temp5 | awk '{print $1,$2}')
            echo $seq_start
            if [ $position -eq $temp5_line ]; then
                seq_end=$temp4_line
            elif [ $position -lt $temp5_line ]; then
                seq_end=$(sed -n "$[$position+1] p" temp5 | awk '{print $2}')
                echo $seq_end
            fi
            sed -n "$seq_start, $[$seq_end-1] p" temp4 | sed 's/_/translation=/' | sed 's/_/_/g' >> $2
        fi # remove this if loop if extract A-domain only
    fi
done < temp3_1
```
